# Supplementary material
Source: PubMed Central journal article supplement (PMC8142131)
Supplement: sj-pdf-1-jcb-10.1177_0271678X20958587.pdf [file sj-pdf-1-jcb-10.1177_0271678X20958587.pdf]

**SUPPLEMENTAL MATERIAL**

**Supplemental Table 1. Subgroup analysis**

|                                   | Overall (n=177) | Favorable outcome (n=80) | Unfavorable outcome (n=97) | P value |
|-----------------------------------|-----------------|--------------------------|----------------------------|---------|
| NIHSS stratification, n (%)       |                 |                          |                            | <0.001  |
| 0-10                              | 30 (16.9)       | 21 (26.3)                | 9 (9.3)                    |         |
| 10-20                             | 50 (28.2)       | 28 (35)                  | 22 (22.7)                  |         |
| 20-42                             | 97 (54.8)       | 31 (38.7)                | 66 (68.0)                  |         |
| pc-ASPECTS stratification, n (%)  |                 |                          |                            | 0.003   |
| 0-8                               | 97 (54.8)       | 34 (42.5)                | 63 (64.9)                  |         |
| 8-10                              | 80 (45.2)       | 46 (57.5)                | 34 (35.1)                  |         |
| Time stratification, hours, n (%) |                 |                          |                            | 0.013   |
| 0-6                               | 43 (24.3)       | 24 (30)                  | 19 (19.6)                  |         |
| 6-12                              | 79 (44.6)       | 40 (50)                  | 39 (40.2)                  |         |
| 12-24                             | 55 (31.1)       | 16 (20)                  | 39 (40.2)                  |         |
| Recanalization condition, n (%)   |                 |                          |                            | 0.004   |
| mTICI 0-2a                        | 20 (11.3)       | 3 (3.7)                  | 17 (17.5)                  |         |
| mTICI 2b-3                        | 157 (88.7)      | 77 (96.3)                | 80 (82.5)                  |         |

Abbreviations: NIHSS, National Institutes of Health Stroke Scale; pc-ASPECTS, posterior circulation Alberta Stroke Program Early Computed Tomography Score; mTICI, modified thrombolysis in cerebral infarction.

**Supplemental Table 2. Comparison of different studies exploring outcome of basilar artery occlusion patients treated with recanalization therapy**

|                            | This study<br>(n=177) | Lindsberg's<br>study <sup>1</sup> (n=50) | Jung's<br>study <sup>2</sup><br>(n=106) | Ottomeyer's study <sup>3</sup> (n=91)                                                        | Bousslama's study <sup>4</sup> (n=214)                                             |
|----------------------------|-----------------------|------------------------------------------|-----------------------------------------|----------------------------------------------------------------------------------------------|------------------------------------------------------------------------------------|
| Age, y                     | 59.7 (SD, 11.8)       | 61.9                                     | 61.6 (SD, 15.1)                         | 62.7 (SD, 14.5)                                                                              | 64.3 (SD, 13.5)                                                                    |
| NIHSS                      | 22 (IQR, 14-32)       | NA                                       | 18.5 (range, 3-36)                      | 21.7 (SD, 7.8)                                                                               | 21 (IQR, 12-28)                                                                    |
| pc-ASPECTS                 | 8 (IQR, 7-10)         | NA                                       | NA                                      | NA                                                                                           | NA                                                                                 |
| GCS                        | 8 (IQR, 5-12)         | NA                                       | NA                                      | 7.7 (SD, 3.7)                                                                                | NA                                                                                 |
| Enrollment period          | 2012-2018             | 1995-2003                                | 1992-2010                               | 2002-2009                                                                                    | 2005-2015                                                                          |
| Recanalization method      | Modern EVT            | IVT                                      | IAT                                     | IVT (35.2%), tirofiban (15.4%), IAT (17.6%), EVT (37.4%), Combination of IAT and EVT (35.2%) | IAT (32.2%), stent retriever (37.8%), aspiration, (20.6%), merci retriever (21.5%) |
| Recanalization rate        | 88.7% (mTICI 2b-3)    | 52% (complete or partial)                | 69.8% (TIMI 2-3)                        | 89% (TIMI 2-3)                                                                               | 87.6% (mTICI 2b-3)                                                                 |
| <b>90-day follow-up</b>    |                       |                                          |                                         |                                                                                              |                                                                                    |
| Favorable outcome          | 42.9%                 | 32%                                      | 44.3%                                   | 32%                                                                                          | 37.8%                                                                              |
| Mortality                  | 30.5%                 | 40%                                      | 40.6%                                   | 42%                                                                                          | 46.7%                                                                              |
| <b>Long-term follow-up</b> |                       |                                          |                                         |                                                                                              |                                                                                    |
| Median observation period  | 12 months             | 2.8 years                                | 3.1 years                               | 4.2 years                                                                                    | NA                                                                                 |
| Favorable outcome          | 45.2%                 | 34%                                      | 42.6%                                   | 28.6%                                                                                        | NA                                                                                 |
| Mortality                  | 37.9%                 | 46%                                      | 43.6%                                   | 56%                                                                                          | NA                                                                                 |

Abbreviations: SD, standard deviation; NIHSS, National Institutes of Health Stroke Scale; IQR, interquartile range; NA, not available; pc-ASPECTS, posterior circulation Alberta Stroke Program Early Computed Tomography Score; GCS, Glasgow Coma Scale; EVT, endovascular

therapy; IVT, intravenous thrombolysis; IAT, intra-arterial thrombolysis; mTICI, modified thrombolysis in cerebral infarction; TIMI, thrombolysis in myocardial infarction.

## Supplemental References

1. Lindsberg PJ, Soenne L, Tatlisumak T, et al. Long-term outcome after intravenous thrombolysis of basilar artery occlusion. *JAMA* 2004; 292: 1862-1866.
2. Jung S, Mono ML, Fischer U, et al. Three-month and long-term outcomes and their predictors in acute basilar artery occlusion treated with intra-arterial thrombolysis. *Stroke* 2011; 42: 1946-1951.
3. Ottomeyer C, Zeller J, Fesl G, et al. Multimodal recanalization therapy in acute basilar artery occlusion: long-term functional outcome and quality of life. *Stroke* 2012; 43: 2130-2135.
4. Bousslama M, Haussen DC, Aghaebrahim A, et al. Predictors of Good Outcome After Endovascular Therapy for Vertebrobasilar Occlusion Stroke. *Stroke* 2017; 48: 3252-3257.
